# Supplementary material for: Physiological and Dual Transcriptional Analysis of Microalga Graesiella Emersonii–Amoeboaphelidium Protococcarum Pathosystem Uncovers Conserved Defense Response and Robust Pathogenicity
Source: Research Square preprint supplement (doi:10.21203/rs.3.rs-844765/v1), 2021-08-27
Supplement: Supplementary file 1 [file 3b93298376676ff2488cd218.xlsx]

## Sheet: Sheet1
ID	protein_id	PHI_id	gene_name	log2FC(MSvsES)	log2FC(LSvsES)	log2FC(LSvsMS)
Cluster-8366.10763	Q9HFV9	PHI:372	PKR1	3.2822	8.2252	4.3745
Cluster-8366.10877	P9WI71	PHI:3624	pknH	2.2147	5.791	3.3205
Cluster-8366.11022	L7N655	PHI:3630	PepN	2.1358	5.9266	3.5209
Cluster-8366.11444	Q4WQ36	PHI:6751	Fbx23	3.8169	8.666	4.5239
Cluster-8366.11609	A0A0J9WWZ9	PHI:6956	gigX4	1.7879	6.3442	4.3006
Cluster-8366.11662	P9WI71	PHI:3624	pknH	3.0742	8.4365	4.6691
Cluster-8366.11810	Q059G5	PHI:4574	NTH1	3.7894	8.167	4.1033
Cluster-8366.17957	P9WMK1	PHI:4496	hspX	2.4232	9.9297	7.1222
Cluster-8366.17958	P9WMK1	PHI:4496	hspX	2.3565	9.8547	7.1764
Cluster-8366.25259	P42375	PHI:3085	GroEL	1.6075	3.9829	2.1246
Cluster-8366.28045	P42375	PHI:3085	GroEL	1.6501	3.9512	2.0467
Cluster-8366.28276	P42375	PHI:3085	GroEL	1.6732	3.9568	2.0282
Cluster-8366.28462	A0QHC4	PHI:7990	LysX	4.5258	6.8677	1.3776
Cluster-8366.29459	B2SI02	PHI:1139	raxQ	2.2045	5.9565	3.4695
Cluster-8366.30543	P42375	PHI:3085	GroEL	1.5838	3.6657	1.8307
Cluster-8366.32166	B2SI02	PHI:1139	raxQ	1.6993	3.1508	1.2046
Cluster-8366.33685	A0A0F6UGK4	PHI:6941	feoB	1.8978	3.4108	1.2667
Cluster-8366.35121	P42375	PHI:3085	GroEL	1.6792	3.8588	1.9276
Cluster-8366.37575	Q59M00	PHI:8897	Ept1_(C7_02690C_A)	1.5344	4.7974	3.0099
Cluster-8366.44770	Q59636	PHI:6438	Ndk	1.587	3.2931	1.4562
Cluster-8366.45400	P9WMK1	PHI:4496	hspX	2.7538	10.651	7.5744
Cluster-8366.4820	Q5KEF4	PHI:4575	NTH2	2.4611	6.7459	3.9987
Cluster-8366.4953	Q59636	PHI:6438	Ndk	2.1778	6.9536	4.437
Cluster-8366.51263	P42375	PHI:3085	GroEL	1.5485	3.969	2.1677
Cluster-8366.56308	E9B636	PHI:2490	MCA	1.4015	2.9834	1.3027
Cluster-8366.64947	Q059G5	PHI:4574	NTH1	3.436	8.005	4.3097
Cluster-8366.66239	Q5KAF1	PHI:3029	PMT2	1.5344	6.3382	4.5002
Cluster-8366.67719	L7N655	PHI:3630	PepN	1.17	5.2798	3.8465
Cluster-8366.70079	L7N655	PHI:3630	PepN	1.2238	5.2305	3.7488
Cluster-8366.7323	A0A0U5BRC2	PHI:7866	Lon	2.5224	7.0496	3.9838
Cluster-8366.74066	B2SI02	PHI:1139	raxQ	1.9081	6.3793	4.2138
Cluster-8366.76265	P42375	PHI:3085	GroEL	1.6189	3.6827	1.8109
Cluster-8366.76417	B2SI02	PHI:1139	raxQ	2.0282	4.0547	1.7841
Cluster-8366.76430	B0YCA2	PHI:7121	tslA	1.7826	5.8408	3.7927
Cluster-8366.77352	P42375	PHI:3085	GroEL	1.5588	3.9483	2.1421
Cluster-8366.77353	P42375	PHI:3085	GroEL	1.6037	3.8479	1.9931
Cluster-8366.7768	A0A0J9WWZ8	PHI:6955	gigX3	1.2765	2.8421	1.3027
Cluster-8366.7872	Q9X4G0	PHI:5042	hmgA	2.0104	5.1464	2.8257
Cluster-8366.79477	K9Y567	PHI:4506	So_(soft)	2.142	5.2491	2.805
Cluster-8366.79490	O93802	PHI:2312__PHI:2844	THR__BRM2	3.3186	9.885	6.2774
Cluster-8366.80300	G0T3B3	PHI:2401	CaRING1	2.8672	6.9183	3.7241
Cluster-8366.80433	P9WMK1	PHI:4496	hspX	4.3386	11.147	6.4642
Cluster-8366.80473	Q4U4T0	PHI:2388	Chi2	4.3437	8.8112	4.1557
Cluster-8366.80725	G0T3B3	PHI:2401	CaRING1	3.4419	8.6238	4.8553
Cluster-8366.80902	Q4WQ36	PHI:6751	Fbx23	1.9942	6.6266	4.3402
Cluster-8366.81192	P9WI71	PHI:3624	pknH	4.1797	9.7503	5.2079
Cluster-8366.81358	G0T3B3	PHI:2401	CaRING1	2.9994	7.9588	4.6712
Cluster-8366.8139	G0T3B3	PHI:2401	CaRING1	2.2268	5.2875	2.7875
Cluster-8366.8147	A6TAK8	PHI:6097	hns	2.4788	7.2667	4.4634
Cluster-8366.82178	A3M2U3	PHI:7809	adeN	1.5761	5.6626	3.8262
Cluster-8366.8219	Q5A663	PHI:7048	Oma1	1.8245	4.5119	2.3688
Cluster-8366.8255	Q9X4P2	PHI:7474	PA0336_(RppH)	2.0859	5.3528	2.9965
Cluster-8366.82853	G0T3B3	PHI:2401	CaRING1	2.542	6.0894	3.2771
Cluster-8366.83045	K9Y567	PHI:4506	So_(soft)	2.0205	5.2104	2.9137
Cluster-8366.83145	G0T3B3	PHI:2401	CaRING1	2.5229	6.0797	3.2303
Cluster-8366.83254	G0T3B3	PHI:2401	CaRING1	2.2413	5.9018	3.3794
Cluster-8366.83364	A6TAK8	PHI:6097	hns	2.9421	7.8383	4.417
Cluster-8366.83387	A0A0F6AXS9	PHI:8808	lon	1.4195	3.9468	2.2449
Cluster-8366.83539	G0T3B3	PHI:2401	CaRING1	2.3779	5.9745	3.2675
Cluster-8366.84408	P81702	PHI:3167	Cerato-platanin	2.7342	6.0531	3.0128
Cluster-8366.84745	B2SI02	PHI:1139	raxQ	2.4873	9.1111	6.1313
Cluster-8366.86533	A0A0F6UGK4	PHI:6941	feoB	2.5204	4.1876	1.3399
Cluster-8366.86534	A0A0F6UGK4	PHI:6941	feoB	2.6152	4.2124	1.2448
Cluster-8366.8712	Q6FM27	PHI:3793	ANP1	1.8942	4.9254	2.714
Cluster-8366.8726	Q873Z8	PHI:285__PHI:7242	CHSV__chsV	1.9651	6.8108	4.5236
Cluster-8366.87865	G0T3B3	PHI:2401	CaRING1	1.5822	5.329	3.4313
Cluster-8366.9046	G0T3B3	PHI:2401	CaRING1	1.7792	4.7186	2.6392
Cluster-8366.9069	K9Y567	PHI:4506	So_(soft)	2.818	6.1949	2.7806
Cluster-8366.91576	Q6FM27	PHI:3793	ANP1	1.471	4.5015	2.7477
Cluster-8366.9731	K9Y567	PHI:4506	So_(soft)	2.2395	5.3626	2.8635
Cluster-8366.9733	O52658	PHI:8556	Acp1_(PA1869)	1.5873	3.3622	1.5275
Cluster-8366.9740	H2FL17	PHI:3242__PHI:4477	rpfF__RpfF	1.5698	6.1438	4.3091
